# Supplementary material
Source: Springer Nature journal article supplement (https://www.springermedizin.de/resource/supplementary/12958_2006_340_MOESM2_ESM.pdf/9567660)

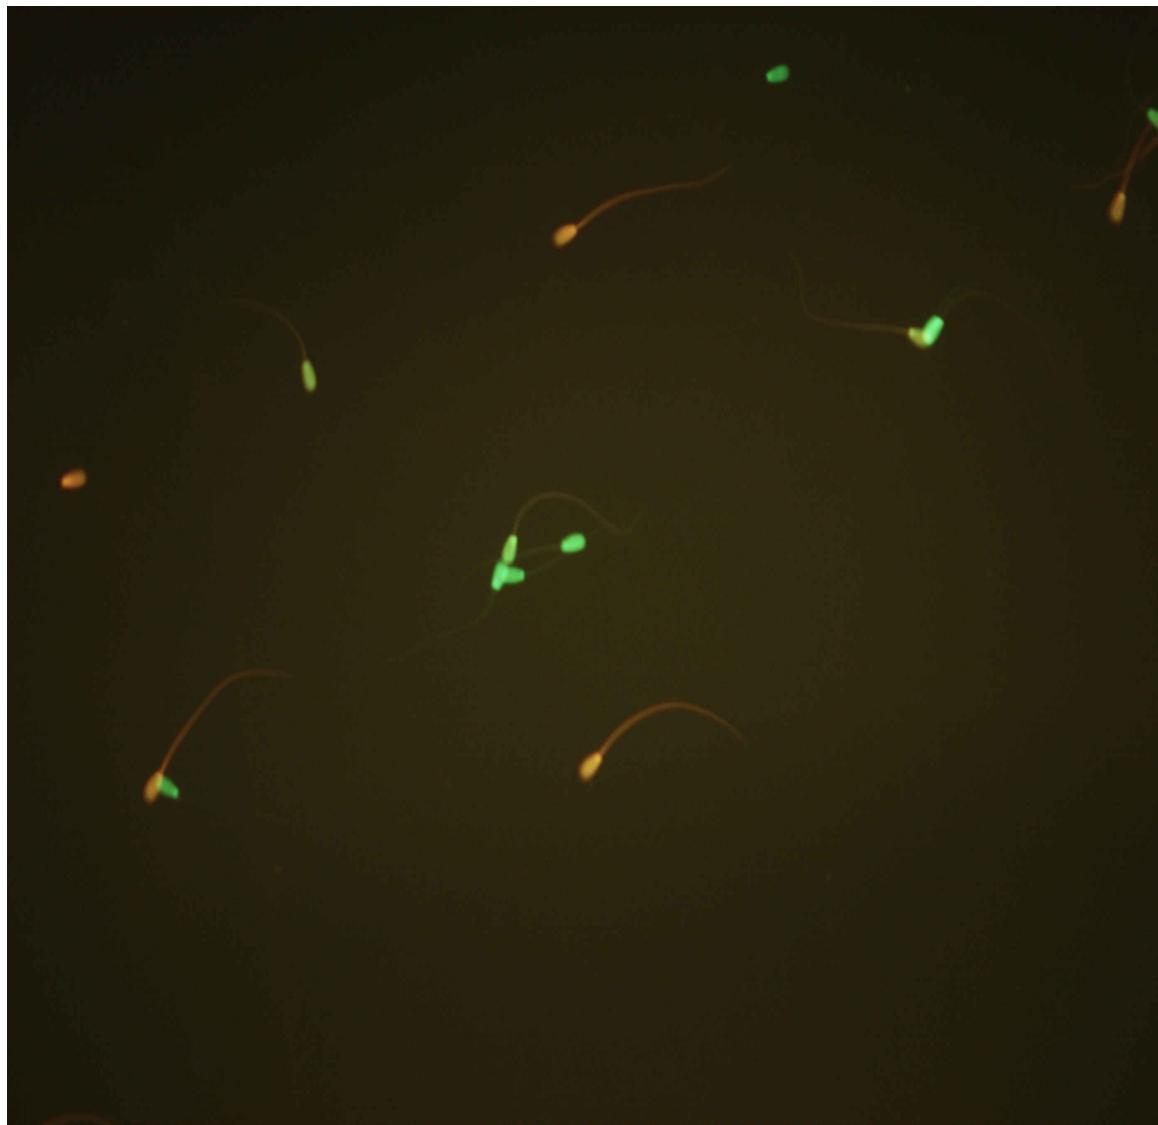

Supplement: MOESM2 [file 9567660]
